# Supplementary material for: Hydrothermal activity lowers trophic diversity in Antarctic sedimented hydrothermal vents
Source: Copernicus journal article supplement (doi:10.5194/bg-2016-318), 2016-08-31
Supplement: Supplementary file 1 [file BELL et al_supplementary.docx]

11. Supplementary Material

Supplementary File 1: Bulk stable isotopic data from faunal specimens and sediment. Missing values denote samples with insufficient elemental mass for accurate measurements.

Supplementary File 2: PLFA data

Supplementary Figure 1: PLFA profiles

Supplementary Figure 2: PCA of PLFA percent composition (Arcsine transformed). BOV = Bransfield Off-Vent. HR1 = Hook Ridge 1. HR2 = Hook Ridge 2. TS = Three Sisters. Goban_control = PLFA profile from Goban Spur, NE Atlantic 995m depth (Main et al. 2015). Loki_Castle from hydrothermal sediments at Loki’s Castle, Arctic Mid-Ocean Ridge 2400m (Jaeschke et al. 2014). PC1 and PC2 explained 50.4 % and 26.1 % of variance respectively.

Supplementary Figure 3: Average-linkage Euclidean cluster dendrogram using species isotopic data
