# Supplementary material for: Hydrothermal activity lowers trophic diversity in Antarctic sedimented hydrothermal vents
Source: Copernicus journal article supplement (doi:10.5194/bg-2016-318), 2016-08-31
Supplement: Supplementary file 2 [file Supp1.xlsx]

## Sheet: Sheet1
Major Taxa	Family	Species	CN						CNS
			Site	Core	Ind.	d15N	d13C		Site	Core/ AGT	Individuals	d15N	d13C	d34S
Polychaeta	Acrocirridae	Acrocirridae sp	BOV	12a	2	9.88499	-23.8992
	Acrocirridae	Acrocirridae sp	BOV	14a	4	10.4849	-23.5217
	Ampharetidae	Ampharete kerguelensis	AXE	77a	1	8.3824	-27.1853		AXE	77a	2	7.38377	-26.7392	13.3184
	Ampharetidae	Ampharete kerguelensis	AXE	77a	1	6.7653	-27.9508
	Ampharetidae	Amphiectis gunneri	HR1	20a	1	8.22552	-25.3696
	Ampharetidae	Amphiectis gunneri	HR2	Multi	2	6.39278	-26.2022
	Ampharetidae	Melinna cristata	AXE	77a	1	9.23658	-26.1066		AXE	77a	1	9.25122	-26.0274	13.2907
	Ampharetidae	Melinna cristata	AXE	77a	1	8.76533	-24.544		AXE	77a	1	8.68848	-25.9807	15.6089
	Cirratulidae	Aphelochaeta glandaria	BOV	15b	1	5.49788	-24.2512		BOV	Multi		7.98743	-24.1754	14.7973
	Cirratulidae	Aphelochaeta glandaria	BOV	13a	1	7.59335	-24.5541
	Cirratulidae	Aphelochaeta glandaria	BOV	13a	1	7.53045	-24.3378
	Cirratulidae	Aphelochaeta glandaria	BOV	13a	1	9.17257	-24.3756
	Cirratulidae	Aphelochaeta glandaria	TS	51a	1	7.98832	-24.6956
	Cirratulidae	Aphelochaeta glandaria	TS	51a	1	8.90346	-26.0228
	Cirratulidae	Aphelochaeta glandaria	TS	50a	1	8.39927	-25.2401
	Cirratulidae	Aphelochaeta glandaria	TS	50a	1	7.97053	-25.4198
	Cirratulidae	Aphelochaeta glandaria	TS	50a	1	5.06283	-26.9743
	Cirratulidae	Aphelochaeta glandaria	TS	50a	1	7.30327	-25.6486
	Cirratulidae	Aphelochaeta glandaria	AXE	77a	1	10.099	-24.8116
	Cirratulidae	Aphelochaeta glandaria	AXE	77a	2	4.34738	-25.7037
	Cirratulidae	Aphelochaeta monilaris	BOV	14a	1	7.72947	-25.6647		BOV	Multi	5	7.8387	-24.7359	14.4766
	Cirratulidae	Aphelochaeta monilaris	BOV	14a	1	7.45903	-25.4434		TS	Multi	1	8.62651	-25.2855	15.9616
	Cirratulidae	Aphelochaeta monilaris	BOV	12a	1	7.67688	-25.3429		TS	51a	1	8.56462	-24.4897	14.869
	Cirratulidae	Aphelochaeta monilaris	BOV	12a	1	8.381	-24.9326		TS	50a	1	9.08939	-24.6906	15.3882
	Cirratulidae	Aphelochaeta monilaris	BOV	16a	1	8.57874	-24.3547
	Cirratulidae	Aphelochaeta monilaris	BOV	16a	1	8.14764	-23.4025
	Cirratulidae	Aphelochaeta monilaris	BOV	14a	1	7.03449	-25.3566
	Cirratulidae	Aphelochaeta monilaris	BOV	14a	1	7.31442	-25.2571
	Cirratulidae	Aphelochaeta monilaris	BOV	15a	1	8.06409	-24.2182
	Cirratulidae	Aphelochaeta monilaris	BOV	14a	1	8.2299	-25.6188
	Cirratulidae	Aphelochaeta monilaris	BOV	Multi	2	7.76727	-26.0172
	Cirratulidae	Aphelochaeta monilaris	BOV	Multi	1	7.52428	-26.1535
	Cirratulidae	Aphelochaeta monilaris	BOV	Multi	1	7.99055	-24.7825
	Cirratulidae	Aphelochaeta monilaris	AXE	77a	3	7.90577	-24.6984
	Cirratulidae	Aphelochaeta monilaris	TS	50a	1	8.55246	-26.2429
	Cirratulidae	Aphelochaeta monilaris	TS	50a	1	8.03074	-26.5639
	Cirratulidae	Aphelochaeta monilaris	TS	50a	1	8.57756	-25.3091
	Cirratulidae	Aphelochaeta monilaris	TS	50a	1	8.02221	-25.7439
	Cirratulidae	Aphelochaeta monilaris	TS	51a	1	9.09847	-23.7722
	Cirratulidae	Aphelochaeta monilaris	TS	51a	1	8.44456	-25.8671
	Cirratulidae	Aphelochaeta monilaris	TS	51a	1	8.01991	-26.572
	Cirratulidae	Aphelochaeta monilaris	TS	51a	1	7.67138	-25.1084
	Onuphidae	Paradiopatra antarctica	AXE	77a	1	9.00975	-25.4027		AXE	77a	1	10.553	-24.142	16.6631
	Onuphidae	Paradiopatra antarctica	AXE	77a	1	9.62436	-23.7804		AXE	77a	1	9.96781	-24.4371	16.725
	Onuphidae	Paradiopatra antarctica	AXE	77a	1	8.84508	-24.5414		AXE	77a	1	9.55375	-25.1212	13.5426
	Onuphidae	Paradiopatra antarctica	AXE	77a	1	9.70806	-24.4258		AXE	77a	1	10.6681	-23.6525	17.9894
	Onuphidae	Paradiopatra antarctica	AXE	77a	1	9.34518	-25.4742
	Onuphidae	Paradiopatra antarctica	AXE	77a	1	10.3236	-24.4775
	Onuphidae	Paradiopatra antarctica	AXE	77a	1	9.41326	-25.7865
	Onuphidae	Paradiopatra antarctica	AXE	77a	1	8.51878	-25.2131
	Onuphidae	Paradiopatra antarctica	AXE	77a	1	10.4395	-23.2202
	Maldanidae	Abyssoclymene	AXE	77a	1	10.7347	-24.324		AXE	77a	1	8.87191	-24.6566	15.5053
	Maldanidae	Abyssoclymene	AXE	77a	1	8.0417	-25.1064		AXE	77a	1	8.72578	-24.5605	17.9569
	Maldanidae	Abyssoclymene	AXE	77a	1	10.5295	-24.8768		AXE	77a	1	9.86352	-24.2347	15.8132
	Maldanidae	Abyssoclymene	AXE	77a	1	10.9593	-24.808		AXE	77a	1	8.81551	-24.3872	17.8026
	Maldanidae	Abyssoclymene	AXE	77a	1	9.88637	-24.3716		AXE	77a	1	10.6272	-23.8861	14.988
	Maldanidae	Abyssoclymene	AXE	77a	1	8.3915	-24.8516
	Maldanidae	Abyssoclymene	AXE	77a	1	8.17705	-24.9128
	Lumbrineridae	Paraninoe antarctica	BOV	16a	1	9.63096	-23.6667		BOV	Multi	1	11.0104	-23.8215	4.44066
	Lumbrineridae	Paraninoe antarctica	BOV	12a	1	10.8352	-23.2029		BOV	12a	1	11.9314	-23.3515	13.1161
	Lumbrineridae	Paraninoe antarctica	BOV	12a	1	10.487	-24.3682
	Lumbrineridae	Paraninoe antarctica	BOV	13a	1	9.43255	-23.834
	Lumbrineridae	Abyssoninoe antarctica							BOV	12b	1	11.0474	-23.1666	12.2629
	Opheliidae	Opheliidae sp	TS	49a	1	10.4898	-21.8025
	Opheliidae	Opheliidae sp	TS	Multi	3	10.6465	-24.3412
	Opheliidae	Opheliidae sp	BOV	14a	2	12.7713	-22.7913
	Opheliidae	Opheliidae sp	BOV	Multi	2	12.3503	-24.5518
	Opheliidae	Opheliidae sp	BOV	13a	1	10.9313	-26.9975
	Opheliidae	Opheliidae sp	BOV	13a	1	12.4128	-26.3203
	Orbiniidae	Leitoscoloplos kerguelensis	HR2	81b	2	10.9175	-22.3261
	Paraonidae	Aricidea antarctica	BOV	13b	1	9.71153	-22.9289		BOV	Multi	23	9.62128	-23.7741	9.74074
	Paraonidae	Aricidea antarctica	BOV	13b	1	8.81838	-24.0259		HR1	22a	1	7.1637	-25.4449	12.3419
	Paraonidae	Aricidea antarctica	BOV	15b	1	6.81448	-24.1356		AXE	77a	1	6.80736	-26.4524	13.1955
	Paraonidae	Aricidea antarctica	BOV	14a	1		-22.8939
	Paraonidae	Aricidea antarctica	BOV	13a	1	5.83983	-25.1389
	Paraonidae	Aricidea antarctica	BOV	12b	1	10.6799	-24.3246
	Paraonidae	Aricidea antarctica	BOV	12b	1	9.53849	-24.5416
	Paraonidae	Aricidea antarctica	BOV	13a	1		-23.686
	Paraonidae	Aricidea antarctica	BOV	15a	1	5.85261	-25.342
	Paraonidae	Aricidea antarctica	BOV	15a	1	8.65832	-23.1906
	Paraonidae	Aricidea antarctica	HR1	22a	2	6.78955	-26.2123
	Paraonidae	Aricidea antarctica	HR1	22a	1	7.50109	-25.0681
	Paraonidae	Aricidea antarctica	HR1	Multi	2	6.812	-25.7964
	Paraonidae	Aricidea antarctica	HR1	21a	1	7.10949	-25.1887
	Paraonidae	Aricidea antarctica	HR1	25a	1	5.81663	-25.4916
	Paraonidae	Aricidea antarctica	TS	Multi	4	8.90657	-25.4147
	Paraonidae	Aricidea antarctica	AXE	77a	1	6.2836	-27.4764
	Paraonidae	Aricidea antarctica	AXE	77a	2	6.62894	-26.5038
	Paraonidae	Aricidea antarctica	AXE	77a	1	6.63909	-25.8811
	Paraonidae	Aricidea antarctica	AXE	77a	1	10.3667	-25.8076
	Scalibregmatidae	Pseudoscalibregma bransfieldia	BOV	14a	1	11.6919	-24.3078		TS	51a	1	11.0239	-23.3117	17.3853
	Scalibregmatidae	Pseudoscalibregma bransfieldia	AXE	77a	1	10.7916	-22.951		BOV	15a	1	7.63756	-23.4795	13.306
	Scalibregmatidae	Pseudoscalibregma bransfieldia	AXE	77a	1	11.7342	-23.1427
	Scalibregmatidae	Pseudoscalibregma bransfieldia	TS	Multi	4	13.1567	-22.065
	Siboglinidae	Sclerolinum	HR1	25b	2	-4.66101	-20.082		HR1	25b	Multiple fragments	-5.35483	-20.0626	-28.8961
	Siboglinidae	Sclerolinum	HR1	25a	2	-4.61029	-20.3694		HR1	25b	Multiple fragments	-5.42049	-20.0376	-28.7507
	Siboglinidae	Sclerolinum	HR1	20b	2	-6.42322	-24.6172		HR1	25b	Multiple fragments	-5.3792	-20.1662	-27.413
	Siboglinidae	Sclerolinum	HR1	24b	2	-3.99062	-20.5396		HR1	25b	Multiple fragments	-5.24261	-19.5736	-21.5357
	Siboglinidae	Sclerolinum	HR1	25b	1	-5.07106	-20.9274
	Siboglinidae	Sclerolinum	HR1	25b	2	-5.58152	-20.4917
	Siboglinidae	Sclerolinum	HR1	25b	2	-4.72009	-20.3475
	Siboglinidae	Sclerolinum	HR1	25b	2	-7.06465	-20.7047
	Siboglinidae	Sclerolinum	HR1	25b	2	-4.65307	-20.3824
	Siboglinidae	Sclerolinum	HR1	25b	1	-5.81804	-19.8448
	Siboglinidae	Sclerolinum	HR1	25b	1	-5.43782	-20.5787
	Siboglinidae	Sclerolinum	HR1	Multi	1	-5.35143	-20.3098
	Siboglinidae	Sclerolinum	HR1	Multi	1	-6.12365	-20.2001
	Siboglinidae	Sclerolinum	HR1	Multi	1	-4.59012	-20.4783
	Siboglinidae	Sclerolinum	HR1	Multi	1	-4.91301	-20.5626
	Siboglinidae	Sclerolinum	HR1	Multi	1	-6.13996	-21.0249
	Siboglinidae	Sclerolinum	HR1	Multi	1	-7.12112	-20.4394
	Siboglinidae	Sclerolinum	HR2	Multi	2	-2.31398	-19.6128
	Siboglinidae	Siboglinum	TS	51a	1	-9.72657	-38.8274
	Siboglinidae	Siboglinum	TS	51a	1	-10.1619	-38.8187
	Siboglinidae	Siboglinum	BOV	13b	1	-8.69549	-43.5798		BOV	12b,13b,14b,15b	6	-8.8242	-45.7253	-22.8538
	Siboglinidae	Siboglinum	BOV	13a	1	-8.62586	-45.5315
	Siboglinidae	Siboglinum	BOV	Multi	1	-8.90873	-42.1812
	Siboglinidae	Siboglinum	AXE	77a	1	-8.27523	-38.6493
	Siboglinidae	Siboglinum	AXE	77b	1	-7.62722	-38.1047
	Spionidae	Aurospio foodbancsia	BOV	Multi	9	6.92451	-25.2829
	Spionidae	Aurospio foodbancsia	HR	Multi	2	7.52816	-25.9174
	Spionidae	Aurospio foodbancsia	HR	Multi	11	8.70831	-25.5464
	Spionidae	Aurospio foodbancsia	TS	Multi	6	8.47981	-25.652
	Spionidae	Aurospio foodbancsia	AXE	Multi	6	8.78782	-25.5602
	Spionidae	Laonice antarcticae	BOV	14a	1	8.71968	-25.7405		AXE	77a	1	10.701	-23.2426	15.1709
	Spionidae	Laonice antarcticae	TS	49a	1	8.40619	-25.1628		BOV	13a	1	8.20563	-23.9337	14.8674
	Spionidae	Laonice antarcticae	TS	49a	1	9.71131	-24.5842		BOV	13a	1	8.08323	-24.2455	16.3311
	Spionidae	Laonice antarcticae	AXE	77a	1	5.24349	-25.9753		BOV	16a	1	7.71559	-24.1723	16.7577
	Spionidae	Laonice antarcticae	AXE	77a	1	14.3523	-22.1145
	Spionidae	Laonice antarcticae	AXE	77a	1	9.50091	-24.4888
	Spionidae	Laonice weddellia	AXE	77a	3	7.54684	-26.0856
	Spionidae	Spiophanes kroeyeri	HR2	81a	2	6.80414	-25.4432
	Syllidae	Exogoninae spA	AXE	77a	7	8.86964	-25.2264
	Syllidae	Sphaerosyllis hirsuta	TS	Multi	15	10.3305	-24.8618
	Syllidae	Sphaerosyllis hirsuta	BOV	Multi	11	10.1866	-24.5923
	Terebellidae	Polycirrus sp.	HR2	32a	1	7.89345	-24.0856		HR2	32a	1	7.31129	-24.5159	11.7624
	Terebellidae	Polycirrus sp.	HR2	32a	1	7.11741	-24.5454		HR	Multi	1	7.87084	-24.9254	13.2758
	Terebellidae	Polycirrus sp.	HR2	32a	1	7.4517	-24.7086		HR	Multi	1	7.27565	-25.258	13.9795
	Terebellidae	Polycirrus sp.	HR2	33a	1	6.03808	-25.4169		HR1	21a	1	7.52044	-24.3959	11.4749
	Terebellidae	Polycirrus sp.	HR2	33a	1	7.69132	-25.2466		HR1	21a	1	6.99887	-24.5953	14.9223
	Terebellidae	Polycirrus sp.	HR2	33a	1	6.75167	-25.4735		HR1	21a	1	7.46141	-24.7365	14.7159
	Terebellidae	Polycirrus sp.	HR2	31a	1	6.8276	-25.3185
	Terebellidae	Polycirrus sp.	HR2	31a	1	7.27824	-24.8479
	Terebellidae	Polycirrus sp.	HR1	24a	1	7.28224	-25.4695
	Terebellidae	Polycirrus sp.	HR1	24a	1	6.99057	-24.985
	Terebellidae	Polycirrus sp.	HR1	25a	1	5.82729	-26.1397
	Terebellidae	Polycirrus sp.	HR1	25a	1	6.76486	-26.0516
	Terebellidae	Polycirrus sp.	HR1	21a	1	6.84613	-25.1431
	Terebellidae	Polycirrus sp.	HR1	21a	1	7.4299	-24.1584
	Terebellidae	Polycirrus sp.	HR1	20a	1	7.27805	-24.6618
	Terebellidae	Polycirrus sp.	HR1	20a	1	6.88063	-24.3468
	Terebellidae	Polycirrus sp.	HR1	20a	1	7.45602	-24.7971
	Terebellidae	Polycirrus sp.	HR1	25a	1	5.85693	-26.3786
	Terebellidae	Polycirrus sp.	HR1	25a	1	6.44631	-26.1413
	Terebellidae	Polycirrus sp.	HR1	25a	1	5.6247	-25.9699
	Terebellidae	Polycirrus sp. Juvenile	HR2	31a	1	6.83822	-25.5109		HR	Multi	12	7.74428	-25.1854	14.0982
	Terebellidae	Polycirrus sp. Juvenile	HR2	31a	1	6.629	-25.258
	Terebellidae	Polycirrus sp. Juvenile	HR2	24a	2	7.16291	-25.2854
	Terebellidae	Polycirrus sp. Juvenile	HR2	33a	1	6.49854	-25.9896
	Terebellidae	Polycirrus sp. Juvenile	HR2	33a	1	6.46564	-25.5573
	Terebellidae	Polycirrus sp. Juvenile	HR2	32a	1	7.19988	-24.7523
	Terebellidae	Polycirrus sp. Juvenile	HR2	33a	1	6.66913	-25.8573
	Terebellidae	Polycirrus sp. Juvenile	HR2	31a	1	6.64898	-25.1391
	Terebellidae	Polycirrus sp. Juvenile	HR2	31a	1	6.78478	-26.1944
	Terebellidae	Polycirrus sp. Juvenile	TS	51a	1	7.50083	-27.1294
	Terebellidae	Polycirrus sp. Juvenile	TS	51a	3	10.1975	-24.8693
Peracarida	Isopoda	Idoteidae	HR1	21a	1	7.98641	-23.505		HR1	Multi	15	7.39282	-23.5417	13.6331
	Isopoda	Idoteidae	HR1	21a	1	9.12047	-22.4985		HR1	Multi	13	7.32832	-23.173	13.0631
	Isopoda	Idoteidae	HR1	22a	1	7.53418	-23.6449
	Isopoda	Idoteidae	HR1	22a	1	5.98277	-24.0148
	Isopoda	Idoteidae	HR1	22a	1	5.88647	-23.7876
	Isopoda	Idoteidae	HR1	22a	1	6.7126	-25.0346
	Isopoda	Idoteidae	HR1	19a	1	6.83469	-24.7496
	Isopoda	Idoteidae	HR2	33a	1	8.17012	-25.3566
	Isopoda	Idoteidae	HR2	32a	1	9.3111	-23.6389
	Isopoda	Idoteidae	HR2	32a	1	6.70478	-24.5344
	Isopoda	Idoteidae	TS	Multi	2		-24.771
	Isopoda	Idoteidae	TS	49a	1	7.37008	-24.0889
	Isopoda	Antarcturidae							HR1	21a	1	9.72155	-21.4793	12.1048
	Isopoda	Sphaeromatidae	HR2	34a	2	8.59068	-19.5072
	Isopoda	Sphaeromatidae	HR2	34a	2	9.60163	-20.4126
	Isopoda	Sphaeromatidae	HR2	34a	1	8.46577	-19.2115
	Isopoda	Sphaeromatidae	HR2	Multi	3	7.73424	-23.8794
	Isopoda	Sphaeromatidae	HR2	31a	1	10.4869	-24.3128
	Isopoda	Sphaeromatidae	HR2	Multi	2	9.17237	-24.05
	Isopoda	Sphaeromatidae	HR2	31a	1	10.824	-25.9905
	Isopoda	Sphaeromatidae	HR2	31a	1	10.936	-22.3164
	Isopoda	Sphaeromatidae	TS	49a	2	9.492	-19.2478
	Isopoda	Sphaeromatidae	TS	49a	1	7.57262	-18.7254
	Isopoda	Sphaeromatidae	TS	49a	2	8.45084	-20.673
	Isopoda	Sphaeromatidae	TS	Multi	4	8.96284	-23.4703
	Amphipoda	Lysianassidae	HR1	25a	1	5.01129	-21.0729		BOV	15a	7	5.40972	-21.7739	15.1878
	Amphipoda	Lysianassidae	HR1	25a	1	4.9869	-22.511
	Amphipoda	Lysianassidae	HR1	25a	1	4.36991	-21.4431
	Amphipoda	Lysianassidae	HR1	25a	1	4.90814	-21.417
	Amphipoda	Lysianassidae	HR2	32a	1	3.81606	-23.6196
	Amphipoda	Lysianassidae	HR2	32a	1	4.67549	-24.1577
	Amphipoda	Lysianassidae	HR2	31a	1	5.38238	-25.9314
	Amphipoda	Lysianassidae	HR2	31a	1	4.71621	-26.1214
	Amphipoda	Lysianassidae	HR2	33a	1	4.52066	-26.2792
	Amphipoda	Lysianassidae	HR2	33a	1	4.37118	-26.0848
	Amphipoda	Lysianassidae	BOV	12a	1	5.42652	-24.2657
	Amphipoda	Lysianassidae	BOV	15a	1	4.26893	-21.7174
	Amphipoda	Lysianassidae	BOV	15a	1	3.91716	-22.8953
	Amphipoda	Lysianassidae	BOV	15a	2	5.847	-22.7888
	Amphipoda	Lysianassidae	BOV	15a	1	4.08106	-22.0129
	Amphipoda	Lysianassidae	BOV	15a	1	4.24175	-23.6161
	Amphipoda	Lysianassidae	TS	49a	1	4.6939	-24.255
	Amphipoda	Lysianassidae	TS	49a	2	7.37671	-24.3334
	Amphipoda	Lysianassidae	TS	49a	1	5.48026	-25.6577
	Amphipoda	Lysianassidae	TS	51a	2	5.3884	-26.3006
	Amphipoda	Phoxocephalidae	TS	Multi	3	12.9919	-24.1941
	Amphipoda	Phoxocephalidae	AXE	77a	1	5.25356	-25.7371
	Amphipoda	Phoxocephalidae	AXE	77a	1	13.1027	-23.3625
	Amphipoda	Uristidae	HR2	32a	3	10.0191	-23.4049		AXE	77a	9	6.27423	-25.5741	13.9968
	Amphipoda	Uristidae	HR2	31a	3	11.3172	-24.4251
	Amphipoda	Uristidae	AXE	77a	1	4.78923	-26.3784
	Amphipoda	Uristidae	AXE	77a	1	13.2616	-22.2488
	Tanaidacea	Neotanaidae	BOV	Multi	5	-3.55902	-31.1437
	Tanaidacea	Neotanaidae	HR1	Multi	5	10.0309	-23.8835
	Tanaidacea	Neotanaidae	HR1	Multi	10	10.3137	-23.0508
	Tanaidacea	Neotanaidae	HR2	Multi	14	8.79132	-24.1587
	Tanaidacea	Neotanaidae	TS	Multi	7	3.08907	-27.243
	Tanaidacea	Tanaidae	TS	50a	1	9.81783	-16.0026
	Tanaidacea	Tanaidae	TS	Multi	5	8.18556	-18.235
	Tanaidacea	Tanaidae	AXE	77a	1	4.41017	-12.8441
	Tanaidacea	Tanaidae	AXE	77a	1	5.47447	-13.3296
	Tanaidacea	Tanaidacea	BOV	12a	2	9.00277	-24.6766
	Cumacea	Pseudocumatidae	HR2	33a	1	10.8945	-24.0323
	Cumacea	Pseudocumatidae	HR2	Multi	2	8.22153	-23.6538
	Cumacea	Pseudocumatidae	HR1	21a	1	10.0999	-23.226
	Cumacea	Pseudocumatidae	HR1	Multi	3	9.89281	-23.0759
	Cumacea	Pseudocumatidae	HR1	22a	3	9.93422	-22.0304
	Cumacea	Gynodiastylidae	HR1	Multi	5	6.28574	-24.6992
Oligochaeta	Naididae	Limnodriloides sp.	BOV	12b	1	9.51578	-22.6816		BOV	Multi	12	10.0733	-22.3688	-1.20979
	Naididae	Limnodriloides sp.	BOV	14a	1	9.44306	-23.3594		HR1	Multi	10	12.795	-22.9637	7.55747
	Naididae	Limnodriloides sp.	BOV	12a	1	9.29152	-22.8949
	Naididae	Limnodriloides sp.	BOV	14b	1	10.6436	-22.8625
	Naididae	Limnodriloides sp.	BOV	12b	1	9.36999	-22.9136
	Naididae	Limnodriloides sp.	BOV	14b	1	10.8749	-22.6971
	Naididae	Limnodriloides sp.	BOV	13a	1	9.79737	-22.1987
	Naididae	Limnodriloides sp.	BOV	12b	1	10.0472	-23.1819
	Naididae	Limnodriloides sp.	BOV	14b	1	9.34956	-22.6965
	Naididae	Limnodriloides sp.	BOV	12b	2	9.34635	-24.1713
	Naididae	Limnodriloides sp.	HR1	25a	1	11.4645	-22.7413
	Naididae	Limnodriloides sp.	HR1	25a	2	9.17195	-22.7328
	Naididae	Limnodriloides sp.	HR1	25a	2	11.0626	-22.8562
	Naididae	Limnodriloides sp.	HR1	25a	2	12.5974	-22.9498
	Naididae	Limnodriloides sp.	HR1	25a	3	11.8961	-22.3551
	Naididae	Limnodriloides sp.	HR1	25a	3	13.0497	-22.8035
	Naididae	Limnodriloides sp.	HR1	25a	4	13.2765	-23.1791
	Naididae	Limnodriloides sp.	HR1	25a	3	11.5304	-23.0168
	Naididae	Limnodriloides sp.	HR1	25a	4	13.4439	-23.2115
	Naididae	Limnodriloides sp.	HR1	25a	4	11.4234	-22.7847
	Naididae	Limnodriloides sp.	HR2	Multi	2	14.9608	-21.4706
	Naididae	Limnodriloides sp.	TS	49a	3	11.0416	-21.7431
	Naididae	Tubificoides sp.	BOV	15b	5	9.80627	-22.2577
	Naididae	Tubificoides sp.	BOV	12b	1	9.87318	-22.1975
	Naididae	Tubificoides sp.	BOV	13a	1	8.71582	-23.0774
	Naididae	Tubificoides sp.	BOV	13a	1	8.88573	-22.3459
	Naididae	Tubificoides sp.	AXE	77a	1	8.05851	-25.4879
	Naididae	Tubificoides sp.	AXE	77a	2	10.0783	-23.0006
	Naididae	Tubificoides sp.	AXE	77a	2	10.9539	-22.4433
	Naididae	Tubificoides sp.	AXE	77a	2	10.5364	-23.1438
	Naididae	Tubificoides sp.	AXE	77a	2	9.79582	-23.167
	Naididae	Tubificoides sp.	HR1	25a+b	3	12.9071	-22.721
	Naididae	Tubificoides sp.	HR2	81a	6	9.66698	-23.7083
	Naididae	Tubificoides sp.	TS	51a	3	10.5049	-20.9952
	Enchytraeidae	Enchytraeidae sp	AXE	77a	1	9.90566	-23.9093
Bivalvia	Thyasiridae	Axinulus antarcticus	BOV	12a	1	8.14087	-24.2438
	Thyasiridae	Axinulus antarcticus	BOV	Multi	2	6.99451	-23.3985
	Thyasiridae	Axinulus antarcticus	AXE	77a	2	7.57005	-17.9116
	Limidae	Limatula sp							BOV	13a	1	9.25924	-21.5575
									Hook Ridge	AGT JC55_037	1	10.8581	-24.311	19.7817
									Hook Ridge	AGT JC55_037	1	11.1203	-23.0721	19.8803
Misc	Sipuncula		HR1	19a	3	8.95319	-23.8495		Hook Ridge	AGT JC55_037	1	12.6247	-22.4444	15.9094
	Sipuncula		TS	51a	2	8.74463	-23.9383
	Sipuncula		TS	51a	4	10.3851	-23.9794
	Sipuncula		AXE	77a	1	12.9011	-23.6804
	Sipuncula		AXE	77a	1	11.2332	-22.8626
	Salp								Hook Ridge	AGT JC55_037	1	1.19646	-28.0578	20.7135
									Hook Ridge	AGT JC55_037	1	5.63888	-25.9231	20.4873
									Hook Ridge	AGT JC55_037	1	3.70346	-27.6871	21.4504
									Hook Ridge	AGT JC55_037	1	4.07919	-27.2232	22.0516
									Hook Ridge	CTD	1	2.2587	-28.4407	22.2745
									Hook Ridge	AGT JC55_037	1	4.68	-27.23	21.93
	Holothuroidea								Hook Ridge	AGT JC55_037	1	9.35044	-18.878	20.8914
									Hook Ridge	AGT JC55_037	1	7.99344	-23.3013	20.8123
	Ophiuroidea								Hook Ridge	AGT JC55_037	1	7.66525	-16.2852	20.157
									Hook Ridge	AGT JC55_037	1	6.67016	-11.3042	20.78
									Hook Ridge	AGT JC55_037	1	5.87213		21.0478
		large ophiuroid from inside mouth							HR2	33a	1		-27.0465	17.3765
		smaller ophiuroid, from inside mouth							HR2	32a	1	4.29571	-25.1039	11.2694
	Scaphopoda		TS	51a	3	8.57109	-21.146
	Scaphopoda		TS	51a	3	8.40712	-21.9443
	Scaphopoda		AXE	77a	3	6.79266	-20.7077
	Echiura		HR2	34a	1	8.90478	-25.3752		HR2	34a	1	9.25437	-24.7949	11.882
	Echiura		HR2	34a	1	9.15106	-24.969		HR2	34a	1	9.77379	-24.7579	9.94327
	Echiura		HR2	34a	1	9.7822	-24.4116		HR2	35a	1	6.79673	-26.0396
	Echiura		HR2	34a	1	10.0535	-23.5649
	Echiura		HR2	34a	1	8.37559	-24.6351
	Echiura		HR2	34a	1	9.60702	-24.7985
	Echiura		HR2	35a	1	9.15656	-24.8591
	Echiura		HR2	Multi	3	8.11337	-26.1578
	Echiura		HR2	35a	1	8.79443	-25.7632
	Echiura		HR2	35a	1	9.32606	-25.1475
	Echiura		HR2	34a	1	9.24219	-24.2091
REF	Antimora rostrata	ANR REF	REF	ANR	N/A	12.9999	-18.7799		REF	ANR	N/A	13.6794	-18.46	18.7578
	Antimora rostrata	ANR REF	REF	ANR	N/A	13.1578	-18.8148		REF	ANR	N/A	13.6472	-18.4847	18.7091
	Antimora rostrata	ANR REF	REF	ANR	N/A	12.9815	-18.9112		REF	ANR	N/A	13.803	-18.5248	18.4715
	Antimora rostrata	ANR REF	REF	ANR	N/A	13.0133	-18.8664		REF	ANR	N/A	13.7113	-18.5179	18.266
	Antimora rostrata	ANR REF	REF	ANR	N/A	12.9437	-18.7997		REF	ANR	N/A	13.9189	-18.4411	18.9211
	Antimora rostrata	ANR REF	REF	ANR	N/A	12.9651	-18.689		REF	ANR	N/A		-18.8673	18.3175
	Antimora rostrata	ANR REF	REF	ANR	N/A	13.1558	-19.4189		REF	ANR	N/A	14.4038	-18.9252	19.0278
	Antimora rostrata	ANR REF	REF	ANR	N/A	13.1757	-18.4788		REF	ANR	N/A	13.83	-18.9174	19.8064
	Antimora rostrata	ANR REF	REF	ANR	N/A	13.3155	-19.2992		REF	ANR	N/A			19.8326
	Antimora rostrata	ANR REF	REF	ANR	N/A	13.1752	-19.022		REF	ANR	N/A			19.4566
	Antimora rostrata	ANR REF	REF	ANR	N/A	13.2377	-18.2452
	Antimora rostrata	ANR REF	REF	ANR	N/A	13.2859	-17.0407
	Antimora rostrata	ANR REF	REF	ANR	N/A	13.161	-18.8994
	Antimora rostrata	ANR REF	REF	ANR	N/A	13.2825	-18.7661
	Antimora rostrata	ANR REF	REF	ANR	N/A	13.4137	-18.7355
	Antimora rostrata	ANR REF	REF	ANR	N/A	13.2351	-19.1929
	Antimora rostrata	ANR REF	REF	ANR	N/A	13.2382	-18.8538
	Antimora rostrata	ANR REF	REF	ANR	N/A	13.1326	-18.9905
	Antimora rostrata	ANR REF	REF	ANR	N/A	13.2709	-18.7332
	Antimora rostrata	ANR REF	REF	ANR	N/A	13.2788	-19.6209
	Antimora rostrata	ANR REF	REF	ANR	N/A	13.4521	-18.6747
	Antimora rostrata	ANR REF	REF	ANR	N/A	13.5448	-19.1512
Sediment					ANR Standard	13.0102	-18.8102		BOV	16a		3.22253	-23.4891	11.5297
						0.0763907	0.0763014		BOV	16a		4.59562	-24.3941	11.436
						13.2156	-19.0656		BOV	15a		3.88687	-24.1195	12.3886
						0.0870222	0.511729		BOV	15a		4.63989	-23.7493	13.0895
						13.2559	-18.5574		BOV	14a			-26.6398
						0.0844275	0.731436		BOV	14a			-26.0865
						13.3075	-19.031		HR1	25a			-24.7621
						0.141423	0.325905		HR1	25a		0.657168	-24.3538
						13.7519	-18.4857		HR1	19a
						0.109967	0.0361383		HR1	19a			-25.4903
						13.2008	-18.8175		HR1	22a			-25.2213
						0.158178	0.499374		HR1	22a			-25.2564
									HR2	33a
									HR2	33a
									HR2	35a
									HR2	35a
									HR2	81a			-26.1129
									HR2	81a		2.65895	-25.9483
									TS	49a
									TS	49a
									TS	51a			-25.4639
									TS	51a			-18.9399
									AXE	77a			-25.6046
									AXE	77a		4.78993	-26.1348	18.0599
									Later CNS runs
									Sediment C only	HR1	6M HCl		-26.6603
									Sediment C only	HR1	6M HCl		-26.4557
									Sediment C only	HR2	6M HCl		-26.0111
									Sediment C only	HR2	6M HCl		-25.7483
									Sediment C only	TS	6M HCl		-25.8928
									Sediment C only	TS	6M HCl		-25.5339
									Sediment C only	BOV	6M HCl		-26.1132
									Sediment C only	BOV	6M HCl		-25.6572
									Sediment NS	HR1		5.40264		14.4607
									Sediment NS	HR1		5.11477		10.2948
									Sediment NS	HR2				16.6681
									Sediment NS	HR2		5.68432		15.9416
									Sediment NS	TS		5.16276		18.8016
									Sediment NS	TS		4.55631		19.0607
									Sediment NS	BOV		5.20278		19.8415
									Sediment NS	BOV		5.07596		20.023
