# Supplementary material for: Hydrothermal activity lowers trophic diversity in Antarctic sedimented hydrothermal vents
Source: Copernicus journal article supplement (doi:10.5194/bg-2016-318), 2016-08-31
Supplement: Supplementary file 3 [file Supp2.xlsx]

## Sheet: Sheet1
	Bransfield Off-Vent			Middle Sister			Hook Ridge 1			Hook Ridge 2
PLFA	nM per g	%	d13C	nM per g	%	d13C	nM per g	%	d13C	nM per g	%	d13C
i14:0	0.0314096	0.119725	-22.07	0.0221137	0.0915836	-27.9639	0.105409	0.215427	-15.6693	0.1	0.8	-28.7889
14:00:00	0.796233	3.03503	-31.205	0.828258	3.43022	-30.9007	3.24609	6.6341	-32.6954	0.8	6.4	-29.5636
i15:0	0.759439	2.89478	-28.5737	0.756806	3.1343	-28.0511	2.02068	4.12971	-29.7193	0.4	3.2	-28.1119
a15:0	1.05676	4.02807	-28.3497	1.0609	4.39369	-27.7065	2.68164	5.48052	-29.1017	0.9	7.2	-28.9364
15:00:00	0.297688	1.13471	-29.3044	0.185495	0.768227	-29.8153	0.495866	1.01341	-29.0068	0.3	2.4	-28.3252
i16:1	0.114532	0.436564	-31.3998	0.0232396	0.0962465	-20.3062	0.218496	0.446546	-27.5652	0	0	n.d.
16:1w11c	0	0	n.d.	0.0584621	0.24212	-23.1346	0.0424376	0.0867307	-17.4385	0	0	n.d.
i16:0	0.340575	1.29818	-28.5119	0.299769	1.24149	-27.8106	0.643003	1.31412	-29.432	0.2	1.6	-28.7881
16:1w11t	0.782928	2.98431	-24.4181	0.663055	2.74603	-25.029	2.40346	4.91201	-25.794	0.3	2.4	-8.64844
16:1w7c	3.98485	15.1892	-28.9209	3.36865	13.9512	-28.1283	11.5	23.5028	-29.2142	2.5	20	-22.9178
16:1w5c	1.1212	4.27373	-34.0475	0.962265	3.98521	-34.0167	2.22798	4.55336	-31.1681	0.3	2.4	-24.3309
16:00:00	4.29449	16.3694	-31.0991	3.79828	15.7305	-29.9856	7.70409	15.745	-31.8311	3.3	26.4	-29.3311
br17:0	0	0	n.d.	0	0	n.d.	0.137962	0.281956	-22.9241	0	0	-15.7591
10-Me-16:0/Phthalate	0.464984	1.77239	-28.5179	0.450479	1.86565	-29.0928	0.967358	1.97701	-30.2755	0.2	1.6	-41.2915
i17:0	0.0846337	0.322601	-33.1968	0.203144	0.841318	-29.7906	0	0	n.d.	0	0	n.d.
a17:0	0.253567	0.966528	-31.9442	0.209653	0.868274	-31.292	0.351127	0.717606	-29.024	0.2	1.6	-28.5751
12-Me-16:0	0.245538	0.935926	-32.9215	0.206912	0.856924	-31.5853	0.332191	0.678906	-28.5994	0.1	0.8	-28.2341
17:1w8c	0.131387	0.500811	-34.0767	0.106258	0.440068	-31.2687	0.271339	0.554542	-27.1372	0.1	0.8	-27.2282
17:0cy	0.330488	1.25973	-36.2018	0.266681	1.10446	-32.8347	0.63367	1.29505	-32.2968	0.2	1.6	-27.6592
17:00:00	0.147858	0.563596	-39.9585	0.0798187	0.330568	-50.39	0.147701	0.301859	-40.0252	0.2	1.6	-30.8071
10-Me-17:0	0	0	n.d.	0	0	n.d.	0.0500183	0.102224	-34.9825	0	0	n.d.
18:3w6,8,13	0.668313	2.54743	-34.6426	0.69239	2.86752	-33.8267	1.22296	2.49939	-31.1624	0.5	4	-29.0439
18:2w6,9	0.120539	0.459464	-27.8089	0.0867056	0.35909	-52.1691	0.377881	0.772283	-29.9623	0.3	2.4	-26.6521
18:1w9	1.12921	4.30426	-29.9591	1.3283	5.50113	-29.8968	1.6986	3.47146	-29.6393	0.4	3.2	-25.5796
18:1w7	4.42056	16.85	-29.0102	3.84125	15.9085	-29.0714	5.43998	11.1178	-29.8673	0.6	4.8	-24.7447
18:1w(10 or 11)	2.33065	8.88381	-30.1153	2.26051	9.36185	-29.9264	2.08691	0.875292	-31.8876	0	1.6	n.d.
18:00:00	0.655836	2.49987	-30.6041	0.536118	2.22032	-30.622	0.680146	4.26506	-29.4208	0.3	0	-29.8641
19:1w6	0.031877	0.121506	-23.4506	0.029819	0.123495	-30.0488	0.0570083	1.39003	-26.2111	0	2.4	n.d.
10-Me-18:0	0	0	n.d.	0	0	n.d.	0.140377	0.116509	-25.3553	0	0	n.d.
19:1w8	0.110037	0.419431	-56.5721	0.167614	0.694172	-37.4626	0.22258	0.286892	-41.1879	0	0	n.d.
19:0cy	0.20107	0.766425	-35.5468	0.200258	0.829367	-34.7963	0.395092	0.454892	-30.4721	0.1	0	-28.6984
20:4(n-6)	0.144031	0.549008	-39.9532	0.201354	0.833907	-34.0658	0	0.807459	n.d.	0	0.8	n.d.
20:5(n-3)	0.412284	1.57152	-37.9915	0.295943	1.22564	-39.2766	0	0	n.d.	0	0	n.d.
20:1(n-9)	0.41964	1.59955	-31.5434	0.41322	1.71135	-33.7264	0	0	n.d.	0	0	n.d.
22:6(n-3)	0.217845	0.830367	-34.1253	0.427393	1.77004	-29.9474	0	0	n.d.	0	0	n.d.
22:1(n-9)	0.10284	0.391997	-31.2892	0.0986801	0.408682	-29.8611	0	0	n.d.	0	0	n.d.
24:1(n-9)	0.0315028	0.12008	-28.6956	0.0161304	0.066804	-29.6462	0	0	n.d.	0	0	n.d.
