# Supplementary figures and images for: Hydrothermal activity lowers trophic diversity in Antarctic sedimented hydrothermal vents
Source: Copernicus journal article supplement (doi:10.5194/bg-2016-318), 2016-08-31

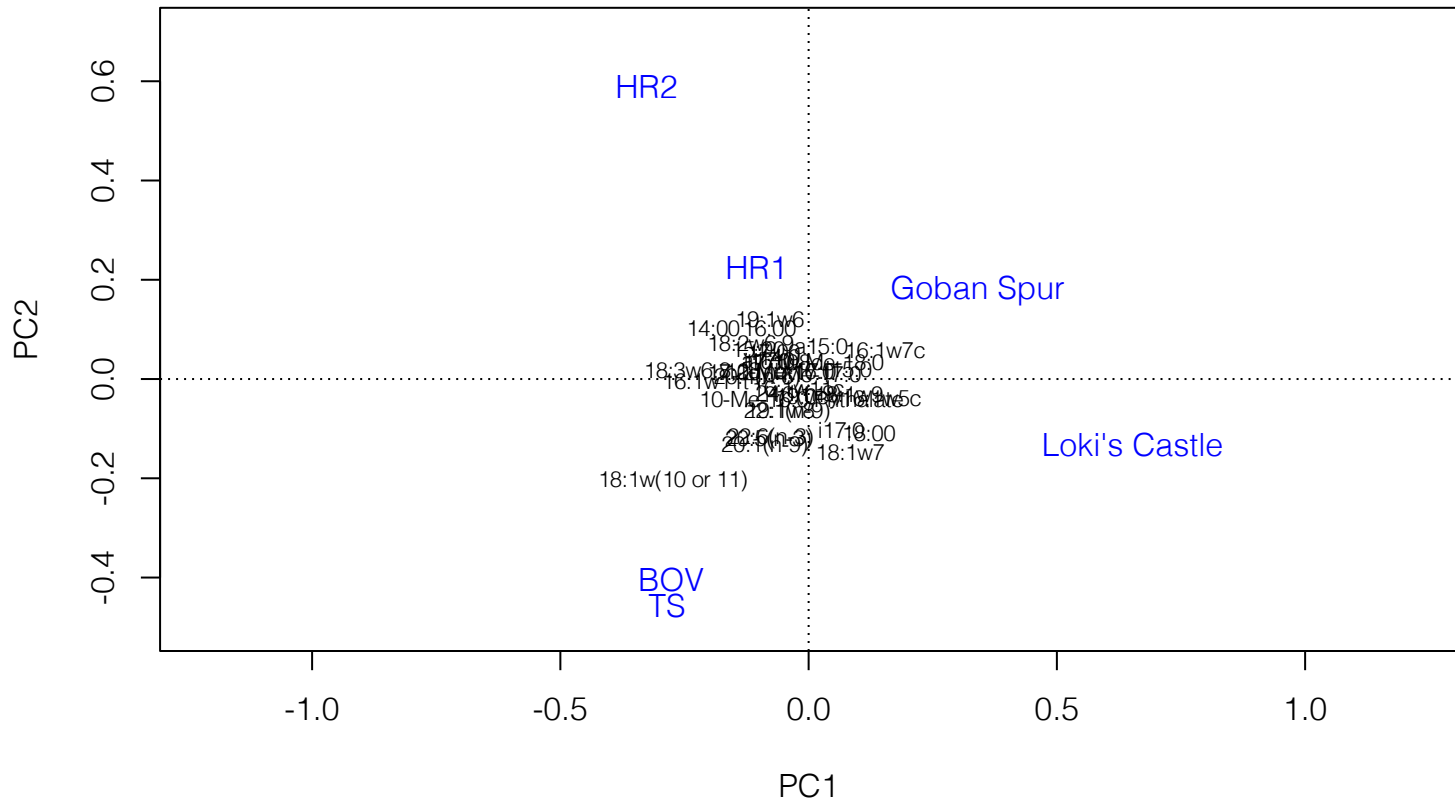

Supplement: Supplementary file 1 [file bg-2016-318-supplement.zip]

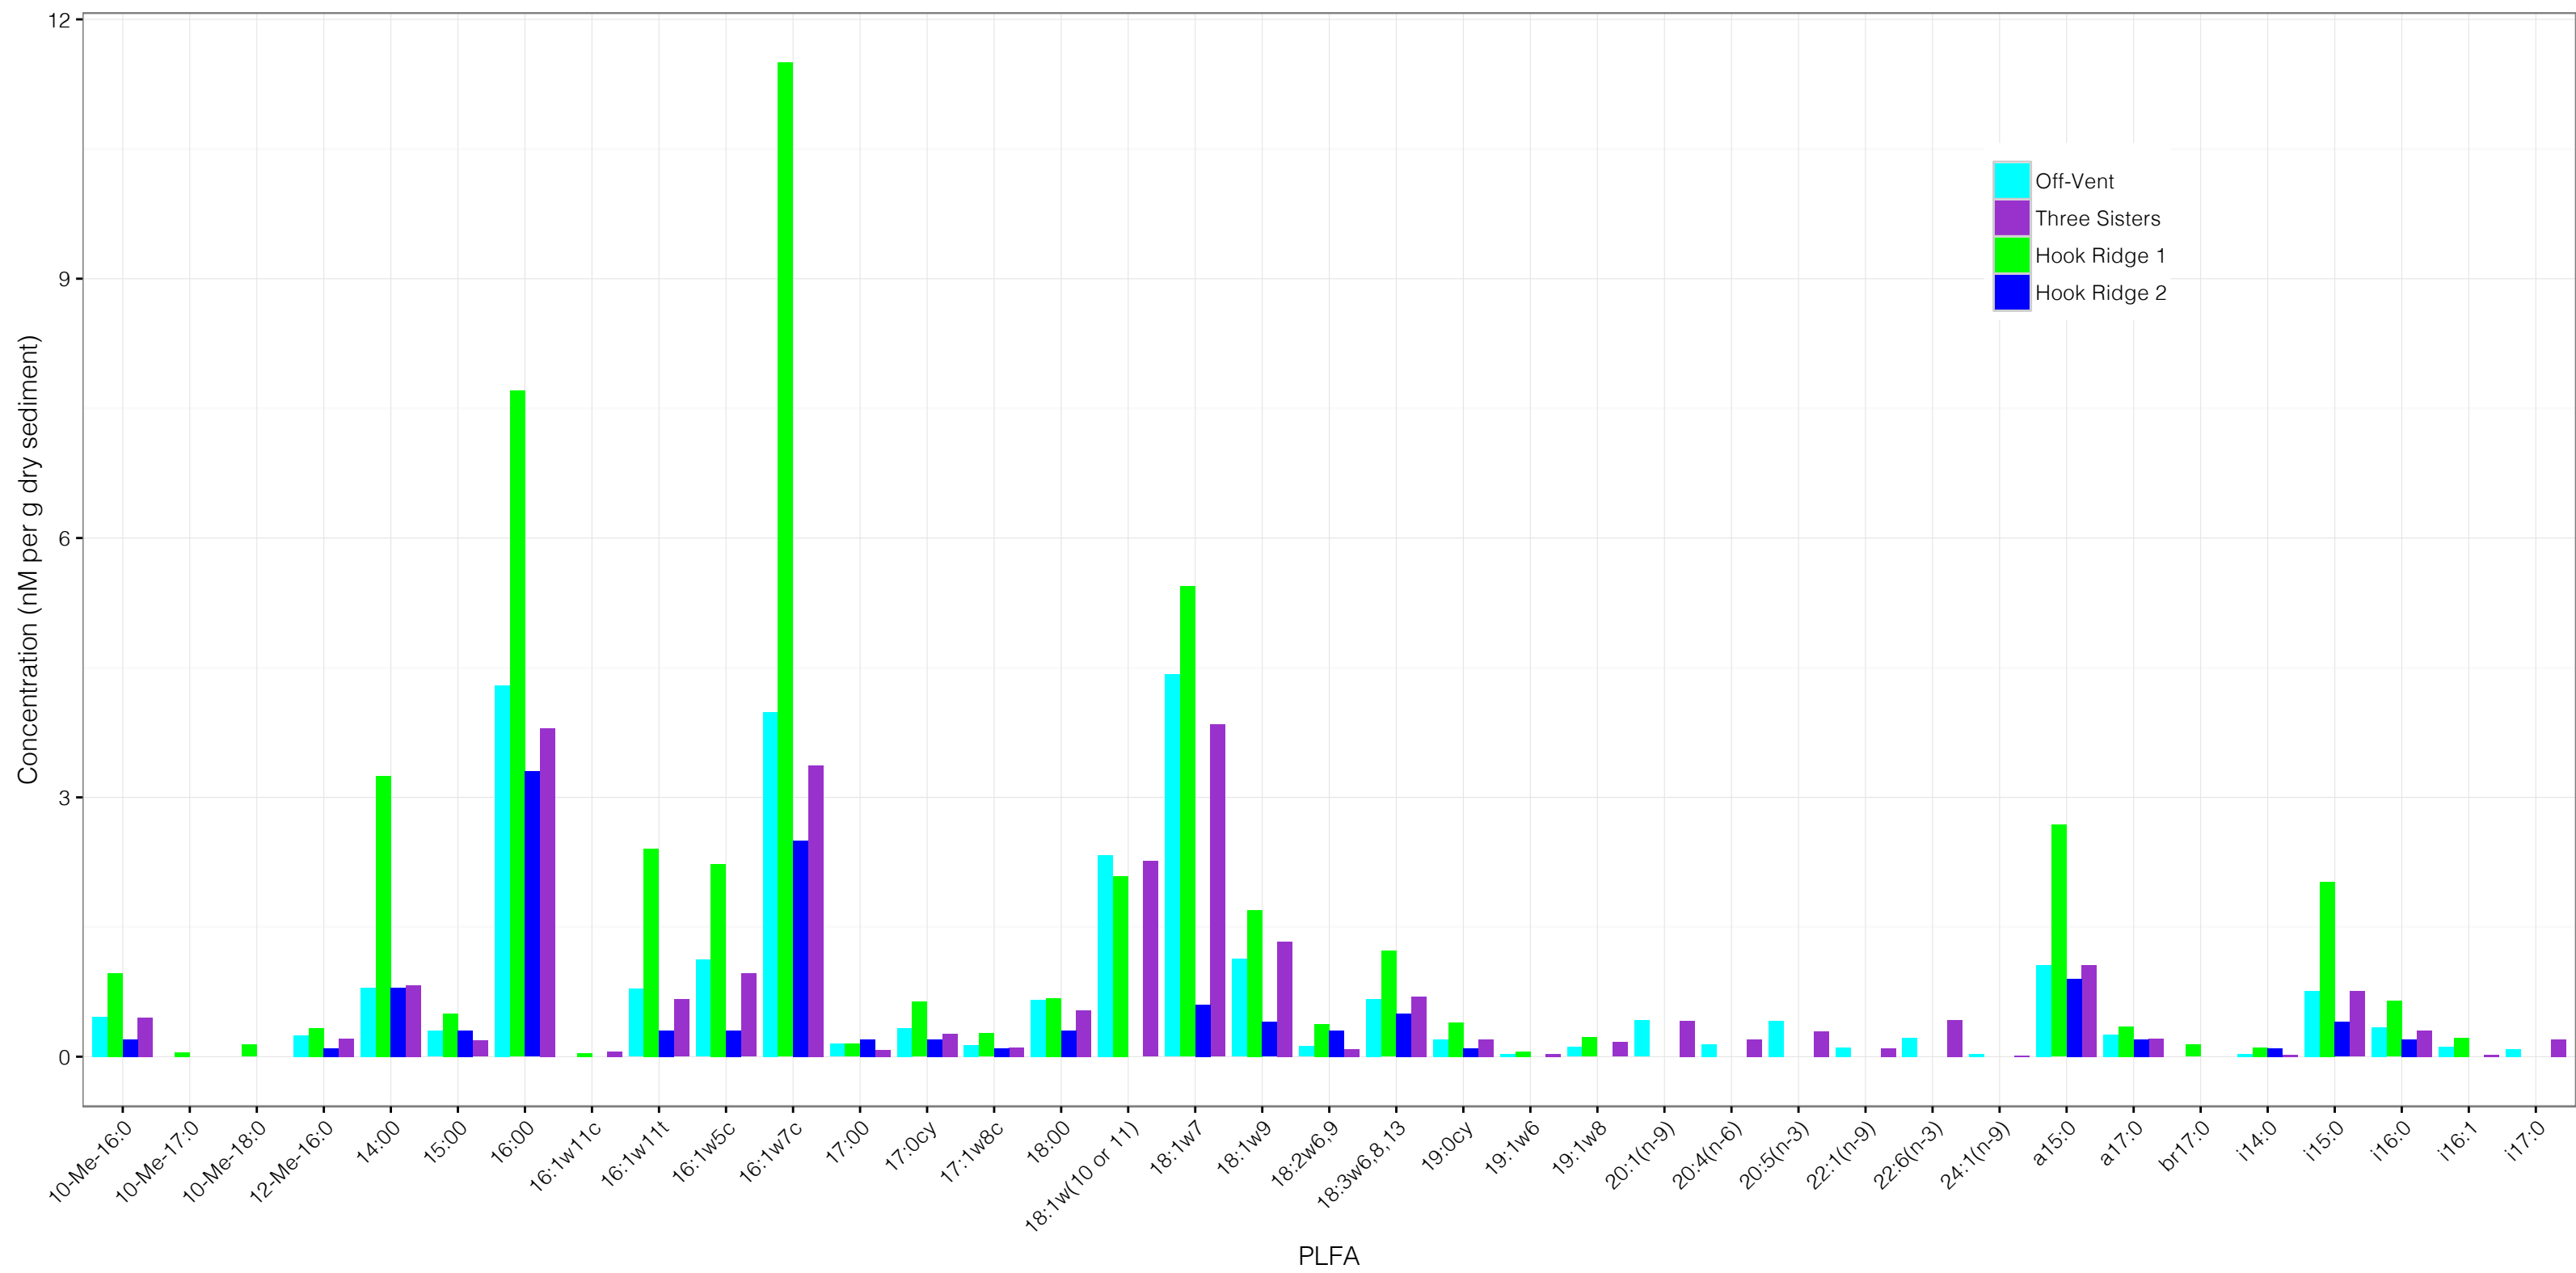

Supplement: Supplementary file 2 [file bg-2016-318-supplement.zip]

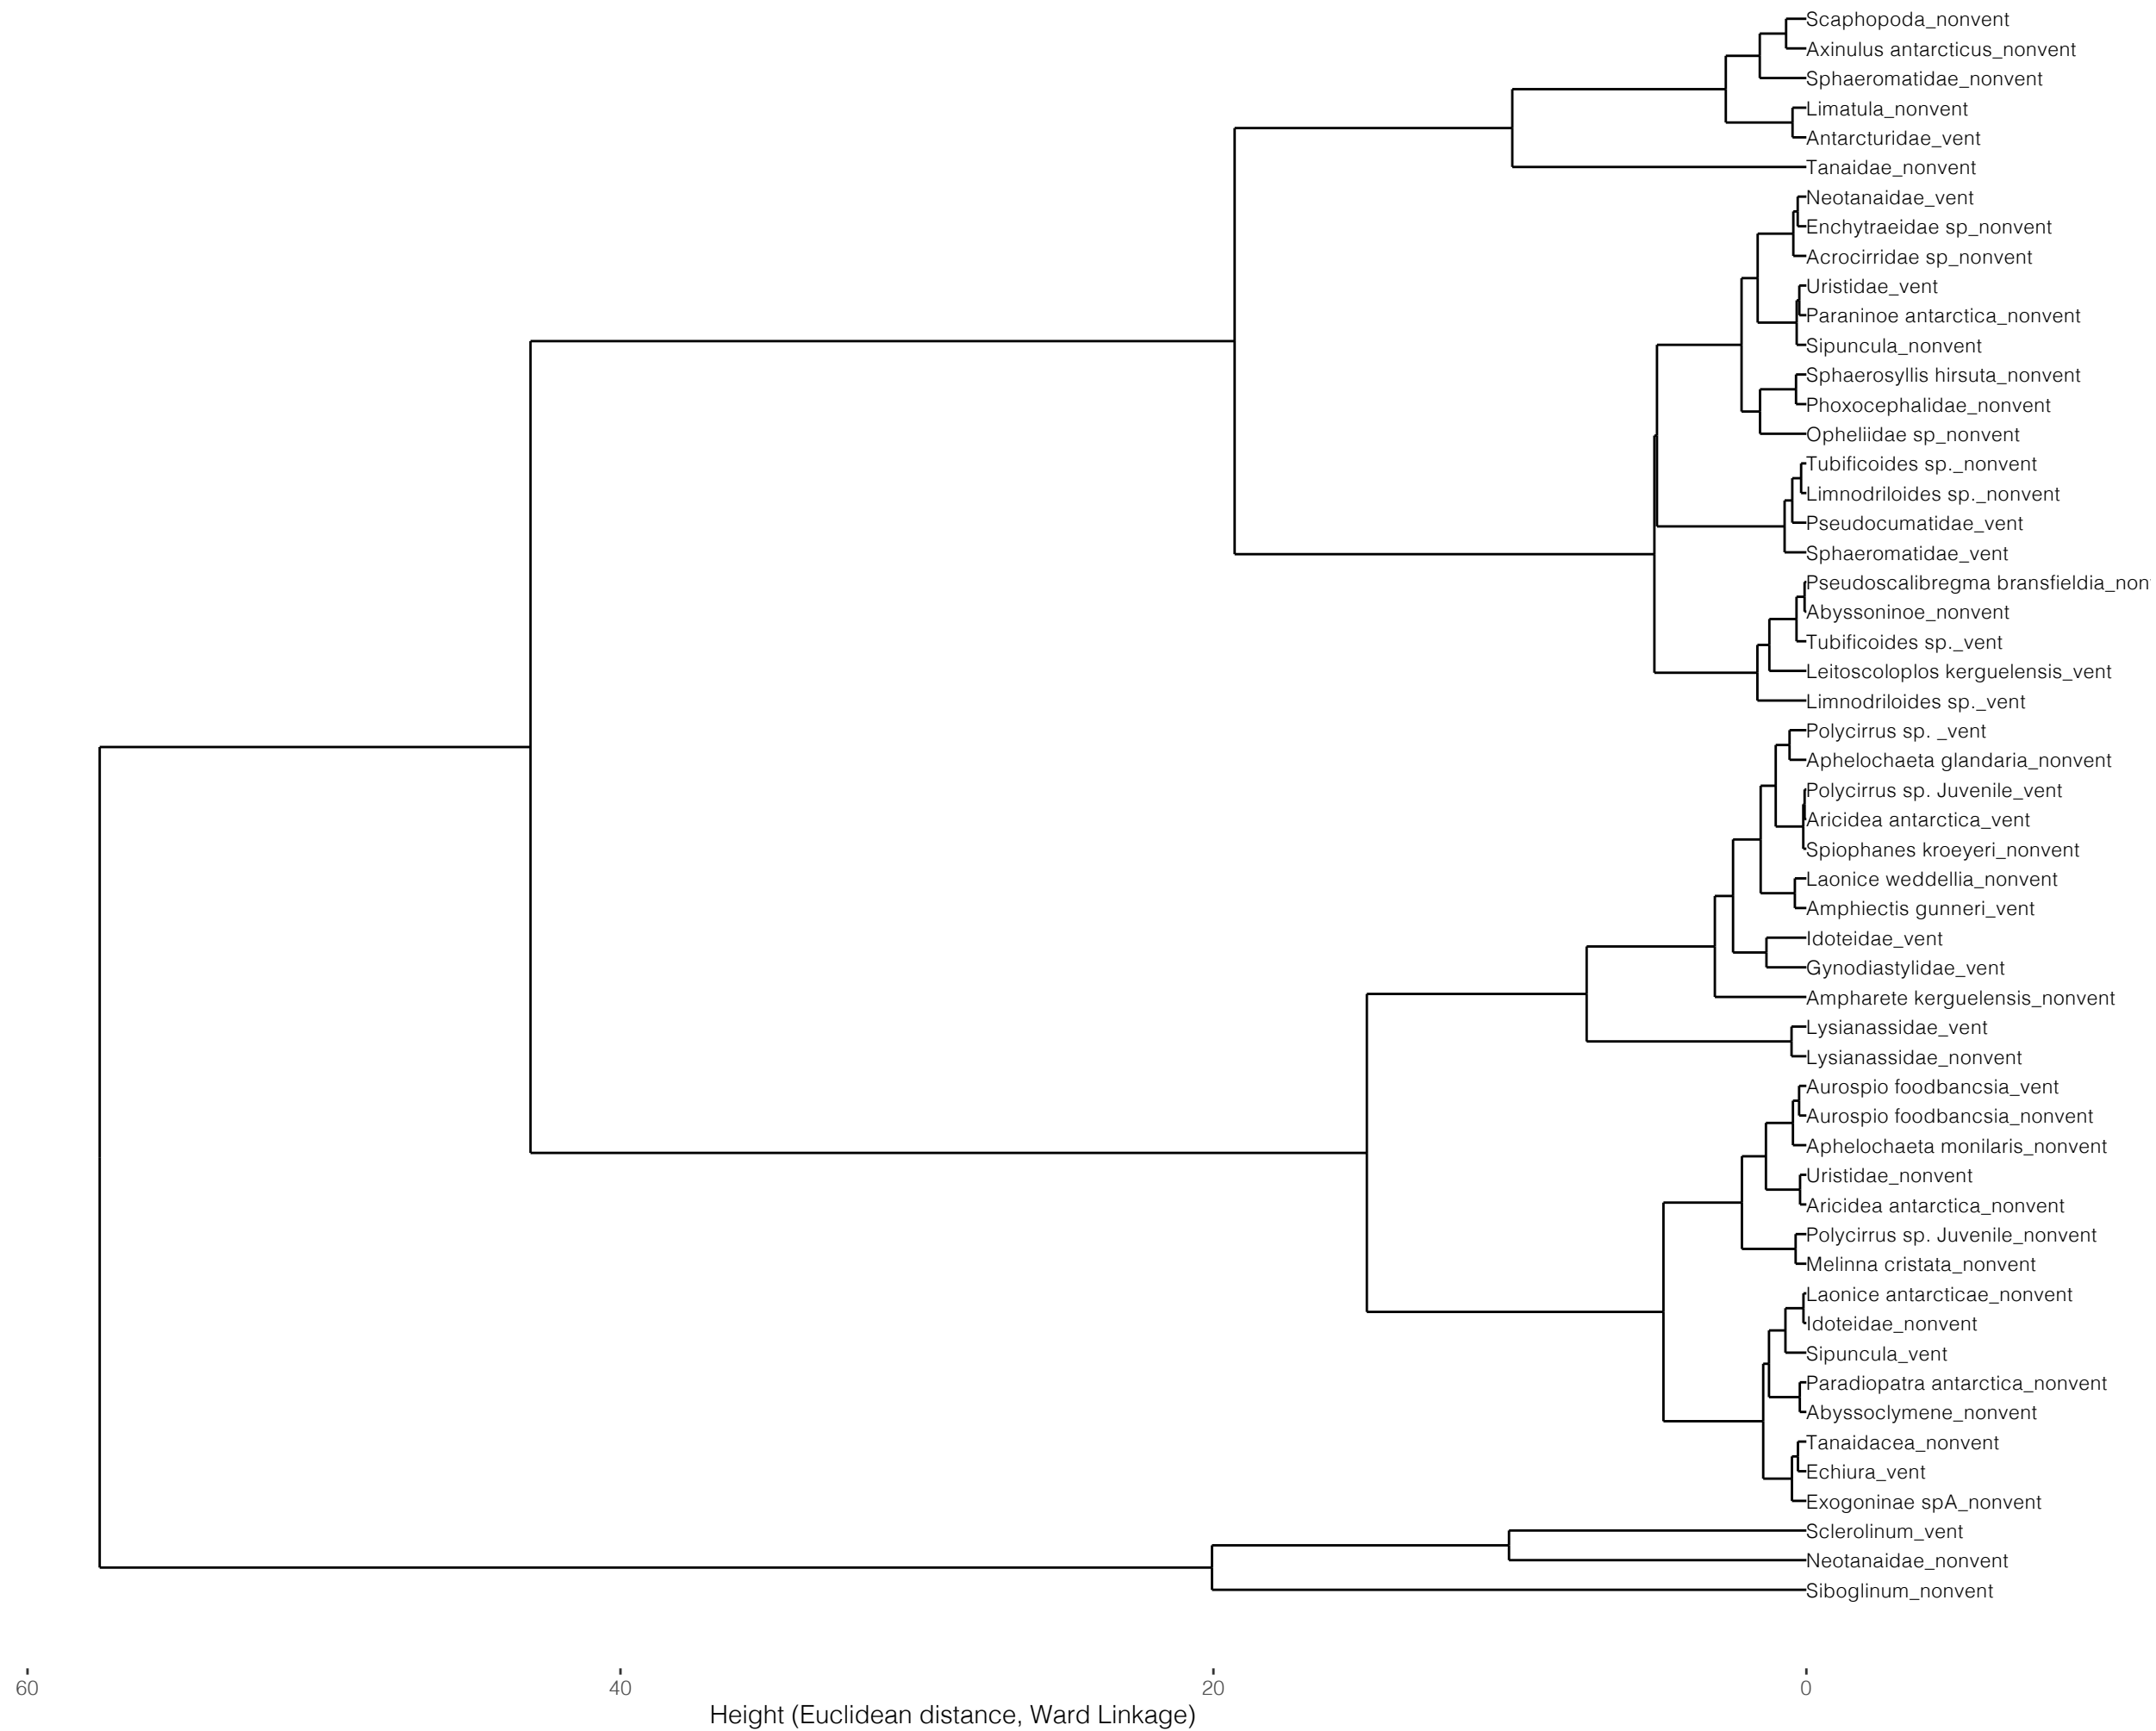

Supplement: Supplementary file 3 [file bg-2016-318-supplement.zip]
